# Supplementary material
Source: HighWire-hosted journal article supplement (https://jnm.snmjournals.org/highwire/filestream/94626/field_highwire_adjunct_files/0/139428_Supplemental_Data.pdf)
Supplement: 139428_Supplemental_Data.pdf [file 139428_Supplemental_Data.pdf]

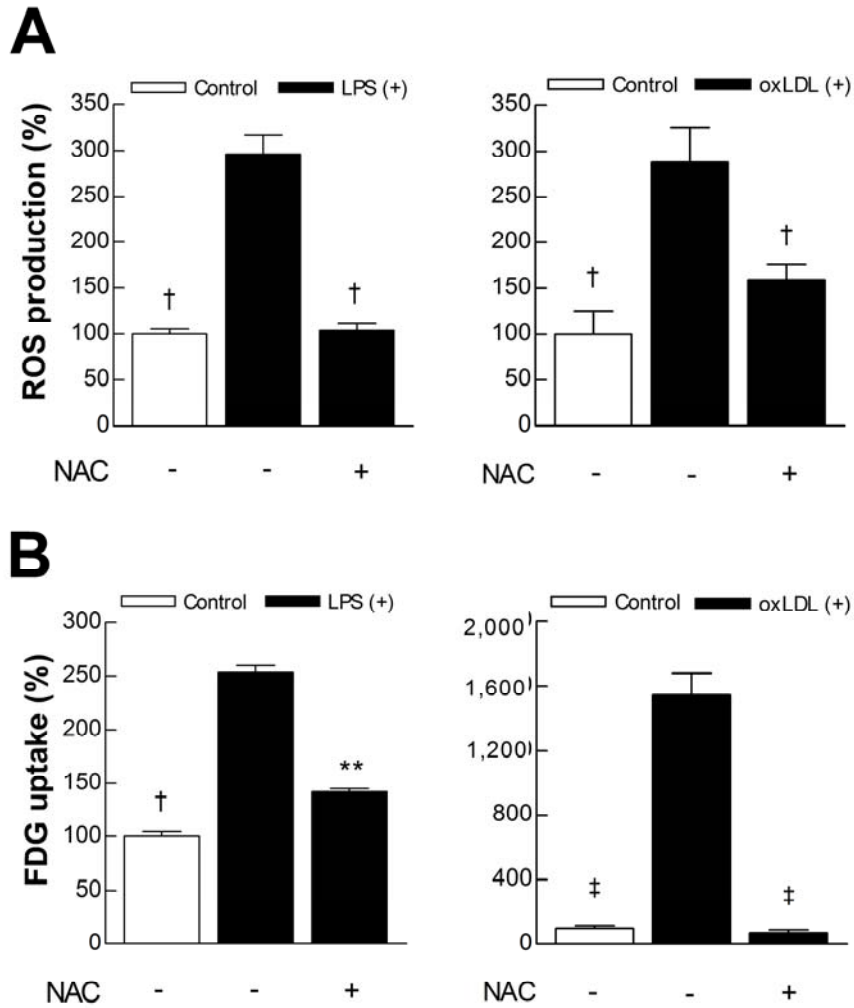

**SUPPLEMENTAL FIGURE 1.** ROS scavenging abolishes LPS and oxLDL effects. (A) Effects of 10 mM N-acetyl-L-cysteine (NAC; 10 mM) on stimulated ROS production by 24 h treatment with 100ng/ml LPS or 20  $\mu$ g/ml oxLDL. Data are mean  $\pm$  SD of triplicate samples from a single experiment. (B) Effects of 10 mM NAC on  $^{18}$ F-FDG uptake stimulated by 100 ng/ml LPS or 20  $\mu$ g/ml oxLDL. Data are mean  $\pm$  SD of triplicate samples from a single experiment (LPS), or mean  $\pm$  SEM of results from two independent experiments (n = 5; oxLDL). \*\* $p$  < 0.01; † $p$  < 0.0005; ‡ $p$  < 0.0001 compared to cells stimulated without NAC.
